# Supplementary material for: Ce-doped Co3O4 nanoplates for photo-assisted methanol electrocatalytic oxidation
Source: Royal Society of Chemistry journal article supplement (doi:10.1039/d4nj02109f), 2024-01-01
Supplement: d4nj02109f1.pdf [file d4nj02109f1.pdf]

# Ce-doped $\text{Co}_3\text{O}_4$ nanoplates for photo-assisted methanol electrocatalytic oxidation

Dandan Wang, Quan Du, Meng Li, Lei Qian\*, Fangxuan Wang

College of Materials and Chemistry & Chemical Engineering, Chengdu University of Technology, Chengdu, Sichuan, 610059, China

\* Corresponding author. qianlei13@cdut.cn.

## Supporting Information

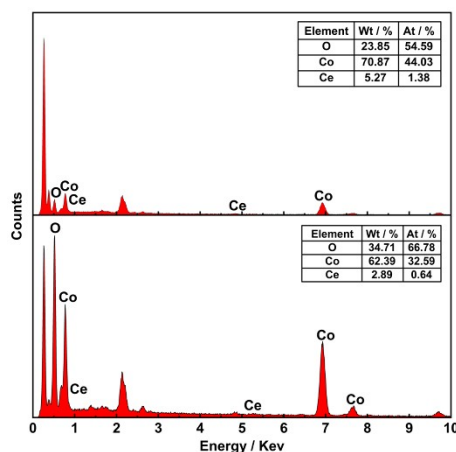

Figure S1 The EDS of Ce-ZIF-67 (A) and Ce- $\text{Co}_3\text{O}_4$  (B).

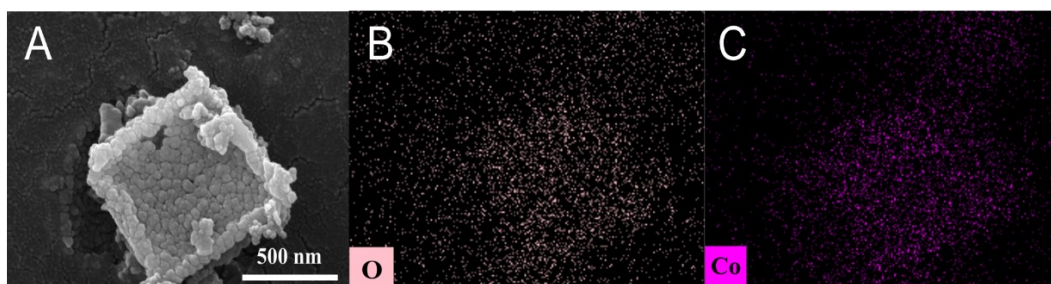

Figure S2 SEM images (A) and EDS mapping of  $\text{Co}_3\text{O}_4$  (B),(C).

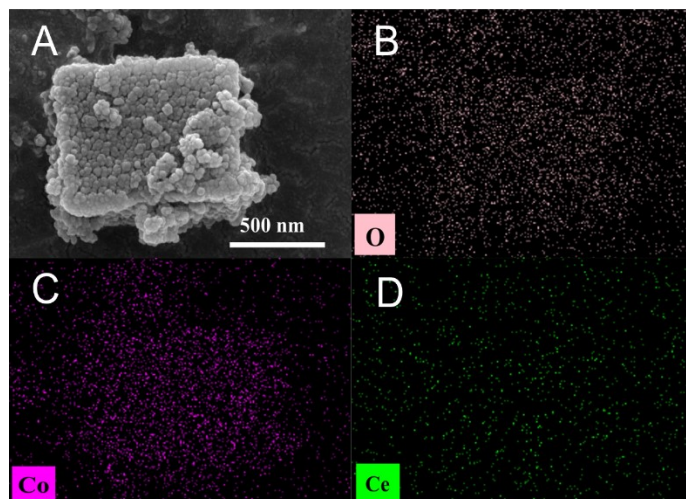

Figure S3 SEM images (A) and EDS mapping of Ce-Co<sub>3</sub>O<sub>4</sub> (B),(C),(D).

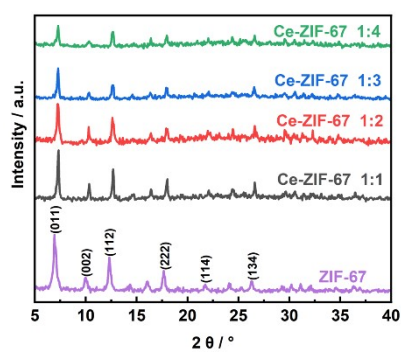

Figure S4 The XRD pattern of Ce-ZIF-67 by controlling the ratio of ZIF-67 and CeCl<sub>3</sub>·7H<sub>2</sub>O was 1:1, 1:2, 1:3 and 1:4.

Table S1 The fitting R<sub>ct</sub> Data for different materials.

|                               | Co <sub>3</sub> O <sub>4</sub> | Ce-Co <sub>3</sub> O <sub>4</sub> | Zn-Co <sub>3</sub> O <sub>4</sub> | Co-Co <sub>3</sub> O <sub>4</sub> | Ni-Co <sub>3</sub> O <sub>4</sub> | Ce-Co <sub>3</sub> O <sub>4</sub> (1:1) | Ce-Co <sub>3</sub> O <sub>4</sub> (1:2) | Ce-Co <sub>3</sub> O <sub>4</sub> (1:3) | Ce-Co <sub>3</sub> O <sub>4</sub> (1:4) |
|-------------------------------|--------------------------------|-----------------------------------|-----------------------------------|-----------------------------------|-----------------------------------|-----------------------------------------|-----------------------------------------|-----------------------------------------|-----------------------------------------|
| R <sub>ct</sub> Light on / Ω  | 6378                           | 3454                              | 4591                              | 5412                              | 5716                              | 1932                                    | 1758                                    | 1886                                    | 2674                                    |
| R <sub>ct</sub> Light off / Ω | 2706                           | 4                                 |                                   |                                   |                                   |                                         |                                         |                                         |                                         |
